# Supplementary material for: Immune factors and thyroid function parameters associated with different degrees anemia in patients living with HIV/AIDS in Southwest China: a cross-sectional study
Source: Research Square preprint supplement (doi:10.21203/rs.3.rs-1349757/v1), 2022-02-23
Supplement: Supplementary file 1 [file 4f952e44bd4f4138ec33bfaf.pdf]

Table 1 Sociodemographic characteristics and their relationship with different degrees of anemia

| Variables             | Total Num (%) | No anemia (%) | Mild anemia (%) | Moderate anemia (%) | Severe anemia (%) | X <sup>2</sup> | P-value |
|-----------------------|---------------|---------------|-----------------|---------------------|-------------------|----------------|---------|
| Age                   |               |               |                 |                     |                   | 13.814         | 0.032   |
| 18-39                 | 159(14.06)    | 92(57.86)     | 10(6.29)        | 33(20.76)           | 24(15.09)         |                |         |
| 40-59                 | 501(44.30)    | 332(66.27)    | 43(8.58)        | 80(15.97)           | 46(9.18)          |                |         |
| >60                   | 471(41.64)    | 329(69.85)    | 37(7.86)        | 71(15.07)           | 34(7.22)          |                |         |
| Sex                   |               |               |                 |                     |                   | 3.535          | 0.317   |
| Female                | 311(27.50)    | 196(63.02)    | 24(7.72)        | 60(19.29)           | 31(9.97)          |                |         |
| Male                  | 820(72.50)    | 557(67.93)    | 66(8.05)        | 124(15.12)          | 73(8.90)          |                |         |
| Ethnicity             |               |               |                 |                     |                   | 3.341          | 0.765   |
| Han                   | 525(46.42)    | 351(66.86)    | 45(8.57)        | 80(15.24)           | 49(9.33)          |                |         |
| Zhuang                | 533(47.13)    | 350(65.67)    | 41(7.69)        | 95(17.82)           | 47(8.82)          |                |         |
| Other (minority)      | 73(6.45)      | 52(71.23)     | 4(5.48)         | 9(12.33)            | 8(10.96)          |                |         |
| Marital Status        |               |               |                 |                     |                   | 11.824         | 0.066   |
| Unmarried             | 228(20.16)    | 31(57.46)     | 24(10.53)       | 45(19.74)           | 28(12.28)         |                |         |
| Married               | 667(58.97)    | 465(69.72)    | 47(7.05)        | 100(14.99)          | 55(8.25)          |                |         |
| Divorce and widowhood | 236(20.87)    | 157(66.53)    | 19(8.05)        | 39(16.53)           | 21(8.90)          |                |         |
| Residence             |               |               |                 |                     |                   | 5.151          | 0.161   |
| Urban                 | 191(16.89)    | 128(67.02)    | 10(5.24)        | 29(15.18)           | 24(12.57)         |                |         |
| Rural                 | 940(83.11)    | 625(66.49)    | 80(8.51)        | 155(16.49)          | 80(8.51)          |                |         |

Table 2 Clinical characteristics of HIV/AIDS and their relationship with anemia in different degrees

| Variables                                    | Total Num<br>(Median,IQR) | No anemia<br>(Median,IQR) | Mild anemia<br>(Median,IQR) | Moderate anemia<br>(Median,IQR) | Severe anemia<br>(Median,IQR) | X <sup>2</sup> /H | P-value |
|----------------------------------------------|---------------------------|---------------------------|-----------------------------|---------------------------------|-------------------------------|-------------------|---------|
| CD3 <sup>+</sup> T cell<br>count(cell/ul)    | 607(336,988)              | 651(383.5,1024)           | 509(285.75,945.75)          | 470(268.25,855.25)              | 491.5(275.25,887.75)          | 23.482            | <0.01   |
| CD4 <sup>+</sup> T cell<br>count(%)(cell/ul) |                           |                           |                             |                                 |                               | 18.432            | 0.005   |
| ≤200                                         | 762(67.4)                 | 482(63.3)                 | 65(8.5)                     | 144(18.9)                       | 71(9.3)                       |                   |         |
| 200-350                                      | 189(16.7)                 | 134(70.9)                 | 13(6.9)                     | 27(14.3)                        | 15(7.9)                       |                   |         |
| >350                                         | 180(18.9)                 | 137(76.1)                 | 12(6.7)                     | 13(7.2)                         | 18(10.0)                      |                   |         |
| CD45 <sup>+</sup> T cell<br>count(cell/ul)   | 879(509,1415)             | 975(570.5,1491.5)         | 750(459.5,1346.5)           | 725(409.5,1214.3)               | 709(399,1352.3)               | 27.419            | <0.01   |
| CD8 <sup>+</sup> T cell<br>count(cell/ul)    | 424(250,688)              | 457(278,711)              | 365(223.25,639.25)          | 351.5(220.25,670.25)            | 369(181.5,623.25)             | 16.128            | 0.001   |
| CD4/CD8                                      | 0.2(0.1,0.5)              | 0.2(0.1,0.6)              | 0.2(0.1,0.4)                | 0.2(0.1,0.4)                    | 0.2(0.1,0.5)                  | 11.033            | 0.012   |
| Neutrophil count                             | 3(1.89,4.54)              | 3.08(2,4.59)              | 2.56(1.53,3.66)             | 2.86(1.79,4.17)                 | 2.94(1.31,5.37)               | 11.391            | 0.01    |
| Thyroxine [T4]                               | 5.94(4.82,7.13)           | 6.06(4.985,7.35)          | 5.72(4.6,7.19)              | 5.74(4.41,6.93)                 | 5.52(4.35,6.56)               | 19.16             | <0.01   |
| Triiodothyronine [T3]                        | 0.62(0.4,0.81)            | 0.64(0.44,0.86)           | 0.59(0.36,0.73)             | 0.54(0.3,0.71)                  | 0.51(0.37,0.69)               | 34.266            | <0.01   |
| Free thyroxine [FT4]                         | 0.86(0.76,0.97)           | 0.88(0.78,0.99)           | 0.85(0.73,0.96)             | 0.82(0.71,0.93)                 | 0.81(0.71,0.93)               | 30.502            | <0.01   |
| Free triiodothyronine<br>[FT3]               | 1.84(1.37,2.35)           | 1.94(1.43,2.41)           | 1.78(1.30,2.18)             | 1.66(1.23,2.01)                 | 1.61 (1.18,2.10)              | 30.416            | <0.01   |
| Lymphocyte count                             | 1.05(0.61,1.54)           | 1.13(0.65,1.64)           | 0.93(0.56,1.42)             | 0.95(0.61,1.445)                | 0.76(0.49,1.29)               | 16.953            | 0.001   |
| Total lymphocytes                            | 2509(2490,2704)           | 2512(2496,2814)           | 2516.5(2500,2687.25)        | 2504.5(2473,2553)               | 2504(2472,2635.25)            | 14.875            | 0.001   |
| Globulin [glob]                              | 36.5(30.7,42.8)           | 35.9(30.3,42)             | 38.25(31.37,43.92)          | 39.5(33.05,46.0)                | 35.65(29.57,43.92)            | 21.094            | <0.01   |
| Leukocyte [WBC]                              | 4.96(3.55,6.82)           | 5.16(3.74,7.00)           | 4.49(3.06,5.95)             | 4.56(3.22,6.59)                 | 4.36(2.77,8.17)               | 13.918            | 0.003   |

Table 3 Ordinal logistic regression analysis revealed the relationship between the characteristics of patients with HIV/AIDS and different degrees of anemia.

| Variables                              | B      | S.E.  | Wald   | aOR    | aOR 95% CI  |             | P-value |
|----------------------------------------|--------|-------|--------|--------|-------------|-------------|---------|
|                                        |        |       |        |        | Lower limit | Upper limit |         |
| CD4 <sup>+</sup> T cell count(cell/ul) |        |       |        |        |             |             |         |
| CD4 ≤ 200                              | 0      |       |        | 1      |             |             |         |
| CD4=200-350                            | 0.188  | 0.339 | 0.307  | 0.722  | 0.514       | 1.013       | 0.06    |
| CD4>350                                | -0.567 | 0.186 | 9.253  | 0.567  | 0.394       | 0.817       | 0.002   |
| CD4/CD8                                | 1.342  | 0.423 | 10.049 | 3.827  | 1.669       | 8.785       | 0.002   |
| Thyroxine [T4]                         | -0.23  | 0.087 | 6.983  | 0.795  | 0.670       | 0.943       | 0.008   |
| Free thyroxine [FT4]                   | 2.362  | 0.844 | 7.836  | 10.612 | 2.030       | 55.479      | 0.005   |
| Globulin [GLOB]                        | 0.027  | 0.012 | 4.965  | 1.027  | 1.003       | 1.052       | 0.026   |
